# Supplementary material for: A novel Zika virus mouse model reveals strain specific differences in virus pathogenesis and host inflammatory immune responses
Source: PLoS Pathog. 2017 Mar 9;13(3):e1006258. doi: 10.1371/journal.ppat.1006258 (PMC5373643; doi:10.1371/journal.ppat.1006258)
Supplement: S1 Table — AP61 = Aedes pseudoscutellaris cells; BHK = baby hamster kidney epithelial cells; C6/36 = Aedes albopictus cells; SM = suckling mouse; Vero = African green monkey kidney cells. (XLSX) [file ppat.1006258.s005.xlsx]

## Sheet: Sheet1
Lineage	Strain	Source Host	Year	Location	Passage History	Genbank Accession [Refrence]
African	MR 766	Rhesus monkey	1947	Uganda	146x SM, 1x C6/36, 1x Vero	HQ234498.1 [4]
African	DAKAR 41519	Aedes africanus	1984	Senegal	1x AP61, 1x C6/36, 3x Vero	HQ234501 [31]
Asian	P6-740	Aedes aegptyi	1966	Malaysia	6x SM, 1x BHK, 1x C6/36, 3x Vero	HQ234499.1 [31]
Asian	FSS13025	Human	2010	Cambodia	5x Vero	JN860885.1 [31]
Asian	PRVABC59	Human	2015	Puerto Rico	3x Vero	KU501215.1 [29]
